# Supplementary material
Source: PubMed Central journal article supplement (PMC7350553)

# Crohn's Disease

## Prior PNA

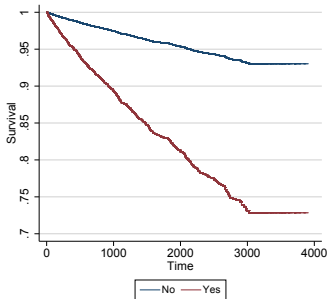

## Escalation Medication

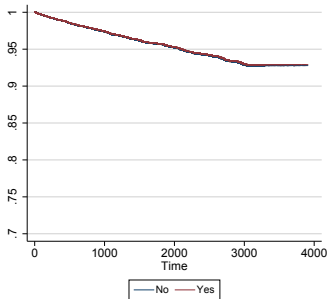

## PNA Vaccine

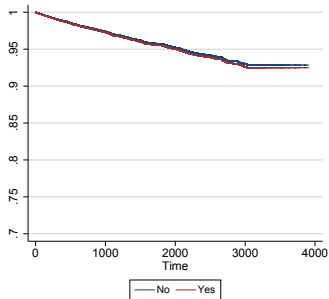

## Steroid Use

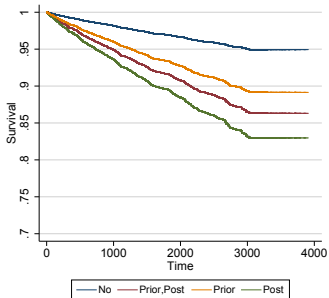

## Charlson Comorbidity

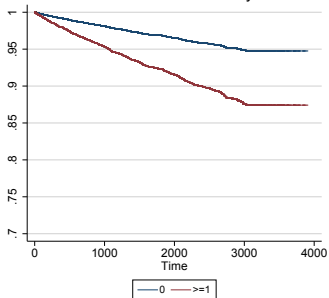

## Age

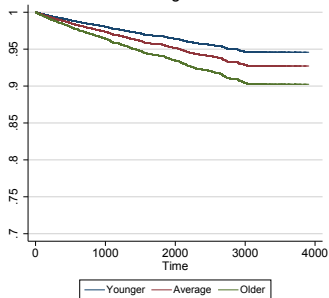

Supplement: izz189_suppl_supplementary_supplement_figure-1.pdf [file izz189_suppl_supplementary_supplement_figure-1.pdf]
