# Supplementary material
Source: PubMed Central journal article supplement (PMC7350553)

# Ulcerative Colitis

### Prior PNA

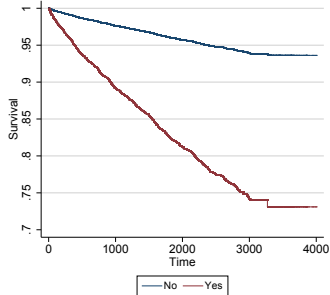

### Escalation Medication

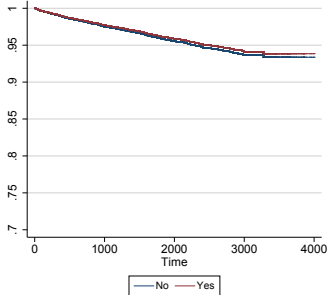

### PNA Vaccine

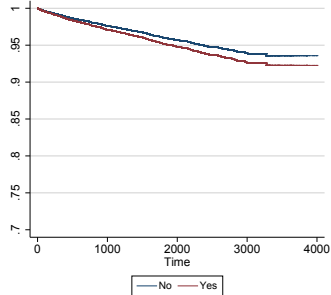

### Steroid Use

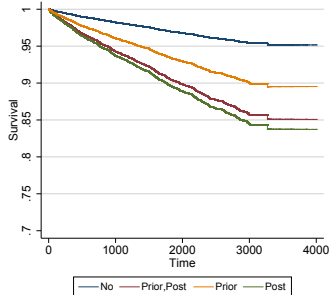

### Charlson Comorbidity

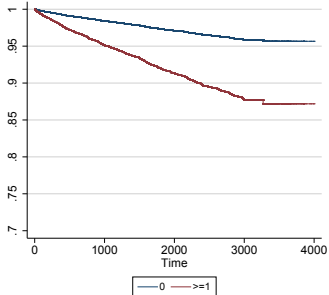

### Age

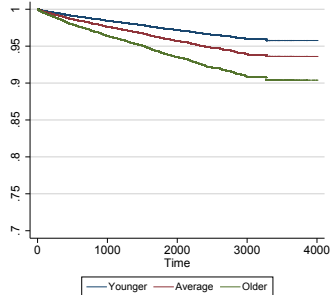

Supplement: izz189_suppl_supplementary_supplement_figure-2.pdf [file izz189_suppl_supplementary_supplement_figure-2.pdf]
