# Supplementary material
Source: PubMed Central journal article supplement (PMC7350553)

# Indeterminate Colitis

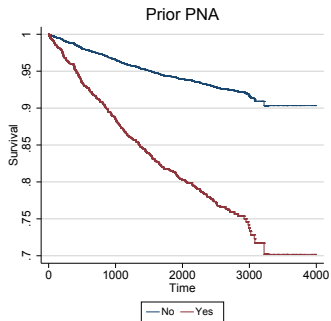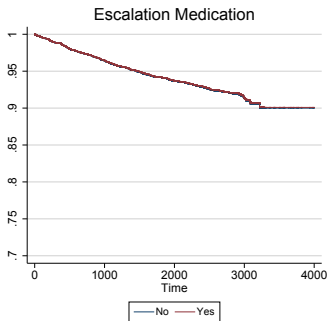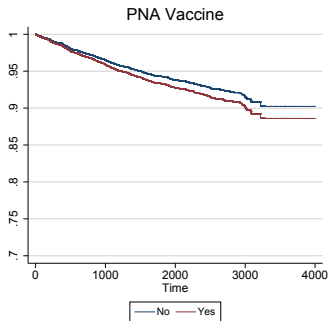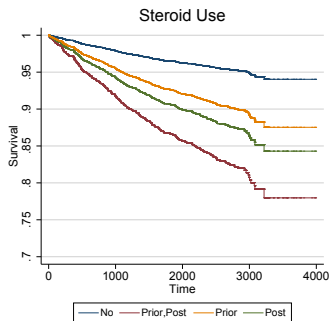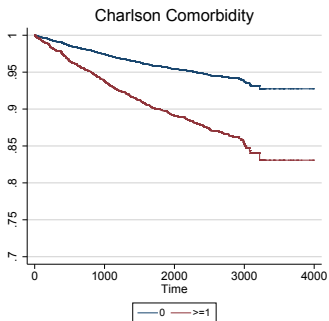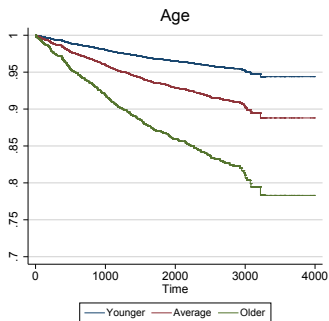

Supplement: izz189_suppl_supplementary_supplement_figure-3.pdf [file izz189_suppl_supplementary_supplement_figure-3.pdf]
